# Supplementary material
Source: PubMed Central journal article supplement (PMC6424637)
Supplement: NIHMS1002552-supplement-1.pdf [file NIHMS1002552-supplement-1.pdf]

**ONLINE REPOSITORY****DEFINITION OF THE STUDY'S EXPLORATORY OUTCOME**

ICS dose-reduction failure was algorithmically defined as either an increase in “daily rescue inhaler use” or in “peak flow variability,” or experiencing a VIDA-protocol–defined treatment failure. The VIDA trial defined treatment failure as “1 or more of the following: peak expiratory flow of 65% or less of baseline measurement on 2 of 3 consecutive measurements; FEV<sub>1</sub> of 80% or less of baseline measurement on 2 consecutive measurements; increase in levalbuterol dose of 8 puffs/d or more for 48 hours (vs baseline); additional use of inhaled corticosteroids or use of oral or parenteral corticosteroids for asthma; emergency department

or hospitalization for asthma with systemic corticosteroid use; participant lack of satisfaction with treatment; and physician clinical judgment for safety reasons.”

We then added 3 additional parameters to the definition of ICS reduction failure: decrease in “rescue-free days,” increase in “rescue inhaler use,” and increase in “peak flow variability,” and defined them using data from the first 50% taper phase. We used those data to look at the distribution of the changes in these measures and choose a cutoff point for each one on the basis of upper and lower limits of the 95% CIs of the mean changes. This process resulted in defining a 3% decrease in rescue-free days; an increase of 32% in rescue inhaler use, and an increase of 17% in peak flow variability, in the definition of taper failure, along with occurrence of “treatment failure.”

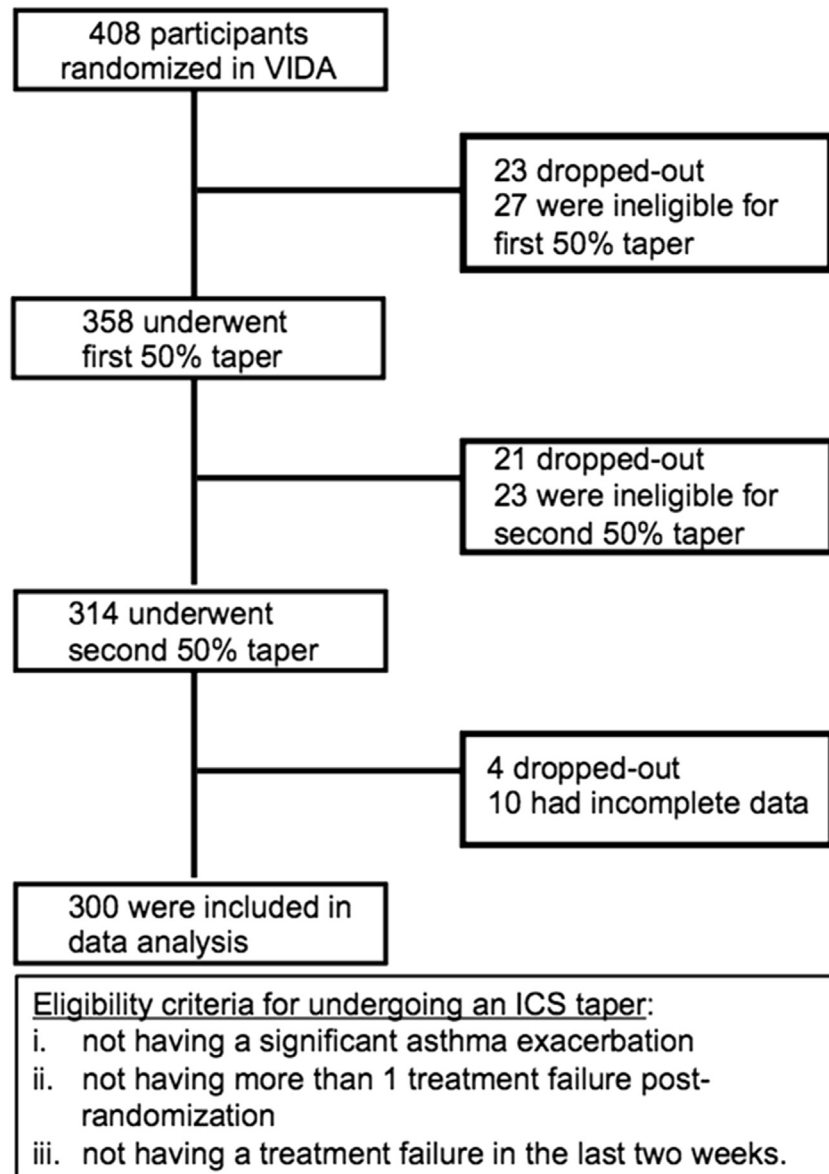

**FIGURE E1.** Flow diagram of participants randomized into the VIDA trial and included in this study.

TABLE E1. Subject characteristics at baseline

| Characteristics                                                 | Placebo (n = 147)   | Vitamin D (N = 153)  |
|-----------------------------------------------------------------|---------------------|----------------------|
| Demographic characteristics                                     |                     |                      |
| Age (y), mean $\pm$ SD                                          | 39.7 $\pm$ 12.7     | 39.7 $\pm$ 12.6      |
| Male*                                                           | 51 (34.7)           | 53 (34.6)            |
| Race/ethnicity*                                                 |                     |                      |
| American Indian/American Native                                 | 0 (0.0)             | 2 (1.3)              |
| Asian and Pacific Islander                                      | 4 (2.7)             | 6 (3.9)              |
| Black                                                           | 44 (29.9)           | 49 (32.0)            |
| White                                                           | 84 (57.1)           | 80 (52.3)            |
| Hispanic                                                        | 14 (9.5)            | 14 (9.2)             |
| Other                                                           | 1 (0.7)             | 2 (1.3)              |
| Household income (<\$50,000/y)*                                 | 71 (52.6)           | 74 (51.7)            |
| Clinical characteristics                                        |                     |                      |
| Obesity (BMI >30)*                                              | 62 (42.2)           | 82 (53.6)            |
| Hip circumference, mean $\pm$ SD                                | 112.23 $\pm$ 18.90  | 113.43 $\pm$ 16.69   |
| Waist circumference, mean $\pm$ SD                              | 98.41 $\pm$ 20.05   | 99.18 $\pm$ 18.63    |
| GERD*                                                           | 32 (22.4)           | 36 (24.5)            |
| Nasal polyposis*                                                | 14 (10.1)           | 10 (6.8)             |
| Sleep apnea*                                                    | 9 (6.1)             | 10 (6.5)             |
| Smoking history (pack-years), mean $\pm$ SD                     | 0 $\pm$ 0           | 0 $\pm$ 0            |
| Age of asthma onset*†                                           | 84 (55.3)           | 81 (50.6)            |
| Duration of asthma (y), mean $\pm$ SD                           | 24.7 $\pm$ 12.9     | 24.5 $\pm$ 13.9      |
| Clinical asthma history in the year before enrollment‡          |                     |                      |
| ED/unscheduled office visit*                                    | 41 (27.9)           | 56 (36.6)            |
| Hospitalizations*                                               | 6 (4.1)             | 4 (2.6)              |
| Corticosteroid use*                                             |                     |                      |
| Systemic corticosteroids (oral, IV, IM)                         | 38 (25.9)           | 47 (30.7)            |
| Inhaled                                                         | 62 (42.2)           | 75 (49.0)            |
| Inhaled + LABA                                                  | 93 (63.3)           | 87 (57.2)            |
| Asthma control§                                                 |                     |                      |
| ACT score                                                       | 20 (17-22)          | 19 (17-22)           |
| Asthma phenotyping and physiological tests                      |                     |                      |
| Change in FEV <sub>1</sub> with prednisone (>5%)*               | 24 (18.9)           | 21 (16.4)            |
| $\Delta$ FEV <sub>1</sub> $\geq$ 12% with 4 puffs of albuterol* | 79 (54.5)           | 84 (54.9)            |
| Methacholine PC <sub>20</sub> §                                 | 1.74 (0.54-4.71)    | 1.70 (0.76-4.70)     |
| Sputum inflammatory cells§                                      |                     |                      |
| Eosinophils                                                     | 0.50 (0.00-1.60)    | 0.20 (0.00-1.30)     |
| Neutrophils                                                     | 40.30 (20.60-55.80) | 41.05 (19.00- 58.90) |
| Macrophages                                                     | 35.80 (24.30-48.20) | 32.80 (19.90- 51.40) |
| Lymphocytes                                                     | 0.60 (0.00-1.40)    | 0.45 (0.00-1.25)     |

ACT, Asthma Control Test; BMI, body mass index; ED, emergency department; GERD, gastroesophageal reflux disease; IQR, interquartile range; LABA, long-acting beta-agonist; MCh, methacholine challenge.

\*Count (percent total).

†Asthma onset before age 10 y.

‡Used at any point in the year before enrollment, with overlap between individuals who used "Inhaled" and "Inhaled + LABA."

§Median (IQR).
